# Supplementary material
Source: ML conference proceedings conference paper supplement (https://openaccess.thecvf.com/content/WACV2023/html/Wang_Video_Object_Matting_WACV_2023_paper.html)
Supplement: Supplementary file 1 [file Wang_Video_Object_Matting_WACV_2023_supplemental.zip]

# Video Object Matting via Hierarchical Space-Time Semantic Guidance

## Supplementary Material

Yumeng Wang<sup>1,2,\*</sup>, Bo Xu<sup>1,\*</sup>, Ziwen Li<sup>1</sup>, Han Huang<sup>1</sup>, Cheng Lu<sup>3</sup>, and Yandong Guo<sup>1†</sup>

<sup>1</sup>OPPO Research Institute, <sup>2</sup>Northwestern Polytechnical University, <sup>3</sup>Xmotors

yandong.guo@live.com

Animated comparison. Given a RGB video sequence (left), one of the recent state-of-the-art VOM approach - TCVOM [3] (center), fails to produce accurate alpha mattes. However, our proposed HSTSG VOM (right) is able to maintain the robustness of the temporal coherence for the alpha prediction. *We suggest readers view this animated figure by Adobe Reader.*

### 1. Overview

We provide additional details in this supplementary Material. In Section 2, we elaborate details of training and the setting of the hyper-parameters. In Section 3, we explain the loss functions in the training stage. In Section 4, we show more visual comparisons on several real-world video sequences.

### 2. Training details

More training details and the setting of hyper-parameters are listed in Table 1. The implementation of the hierarchical space-time semantic guidance video object matting (HSTSG) is based on the public PyTorch toolbox and trained on the Tesla V100 GPU. We first train our HSTSG on the DIM [2] dataset for  $1.0 \times 10^5$  iterations. After initializing the model with the pre-trained weights, we proceed to train the HSTSG on the VideoMatting108 dataset (VMD) [3] and DVM dataset [1] for  $2.0 \times 10^5$  iterations.

| Parameter                | Value                |
|--------------------------|----------------------|
| Optimizer Adam           | Adam                 |
| Weight decay             | $1.0 \times 10^{-7}$ |
| Learning rate            | $1.0 \times 10^{-5}$ |
| Batch Size               | 4                    |
| Input image size         | $512 \times 512$     |
| Number of Pre iterations | $1.0 \times 10^5$    |
| Number of VMD iterations | $2.0 \times 10^5$    |
| Number of DVM iterations | $2.0 \times 10^5$    |
| Loss weight $\lambda_1$  | 1                    |
| Loss weight $\lambda_2$  | 1                    |
| Loss weight $\lambda_3$  | 3                    |
| Loss weight $\lambda_4$  | 1                    |
| Loss weight $\lambda_5$  | 1                    |

Table 1. Training implementation details and hyper-parameter setting.

### 3. Loss Functions

We utilize the binary cross-entropy (BCE) function to supervise the semantic mask prediction, as follow:

$$L_m = \text{BCE}(m, \hat{m}) \quad (1)$$

where  $\hat{m}$  is the predicted semantic mask and  $m$  is the Gaussian transformed thumbnail of the ground truth alpha matte. For the alpha prediction, we compute the pyramid Laplacian loss  $L_{lap}$ , alpha matte loss  $L_a$  and foreground loss  $L_f$

\*Yumeng Wang and Bo Xu contribute equally.

†The corresponding author.

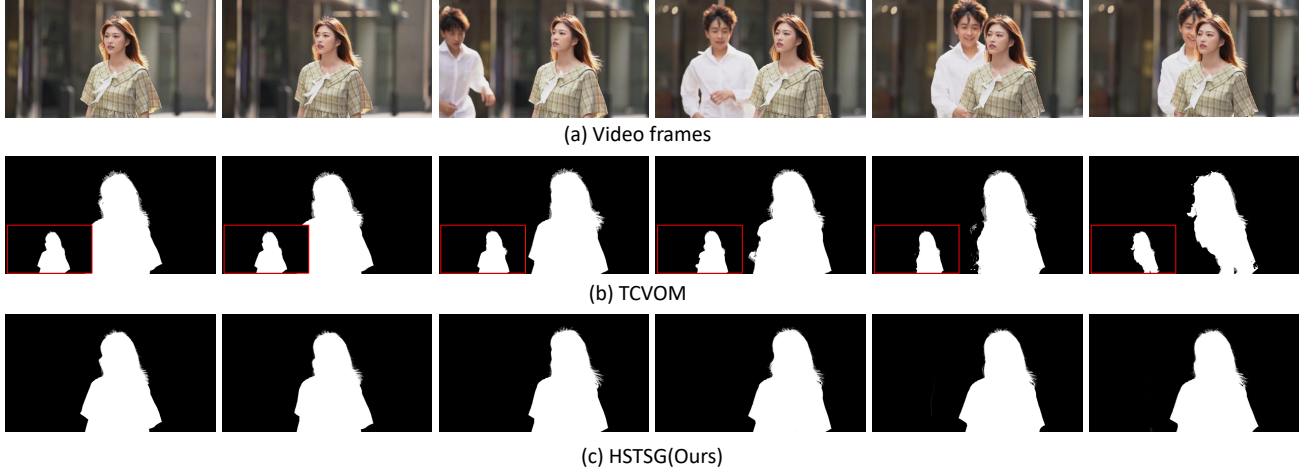

Figure 1. Visual comparisons on the real-world high-resolution video 1. Red boxes represent trimaps generated by TCVOM [3].

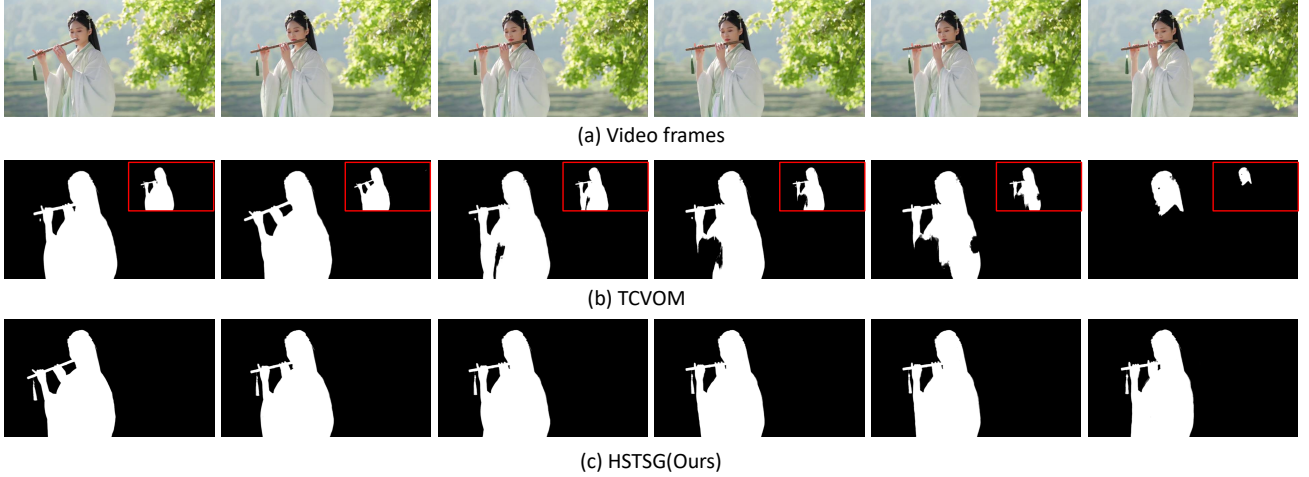

Figure 2. Visual comparisons on the real-world high-resolution video 2.

as follows:

$$L_a = \|a - \hat{a}\|_1 \quad (2)$$

$$L_f = \|f - \hat{f}\|_1 \quad (3)$$

$$L_{lap} = \sum_{i=1}^5 2^{i-1} \|a - \hat{a}\|_1 \quad (4)$$

where  $\hat{a}$  and  $a$  represent the predicted and the ground truth alpha mattes separately.  $\hat{f}$  and  $f$  represent the predicted and the ground truth foregrounds. To learn more refined alpha matte, we only measure pixels where  $0 < a < 1$  by  $L_1$  loss:

$$L_a^* = \|(a - \hat{a}) * (0 < a < 1)\|_1 \quad (5)$$

The total matting loss  $L_{total}$  is:

$$L_{total} = \lambda_1 L_m + \lambda_2 L_a + \lambda_3 L_m + \lambda_4 L_m + \lambda_5 L_{lap} \quad (6)$$

where  $\lambda_i$  is listed in Table 1.

#### 4. More visual comparisons on real-world video sequences

We display more representative visualizations on real-world high-resolution video sequences in Figure 1, 2 and 3. Given the limited number of user-annotated trimaps, TCVOM [3] is limited by insufficient robustness in the temporal coherence of its trimap propagation. Visual comparisons also demonstrate the robustness of our proposed hierarchical space-time semantic guidance mechanism in temporal coherence. Meanwhile, our cross-frame attention refinement network can also enhance the temporal smoothness of predicted alpha mattes.

#### References

- [1] Yanan Sun, Guanzhi Wang, Qiao Gu, Chi-Keung Tang, and Yu-Wing Tai. Deep video matting via spatio-temporal alignment and aggregation. In *Proceedings of the IEEE/CVF Con-*

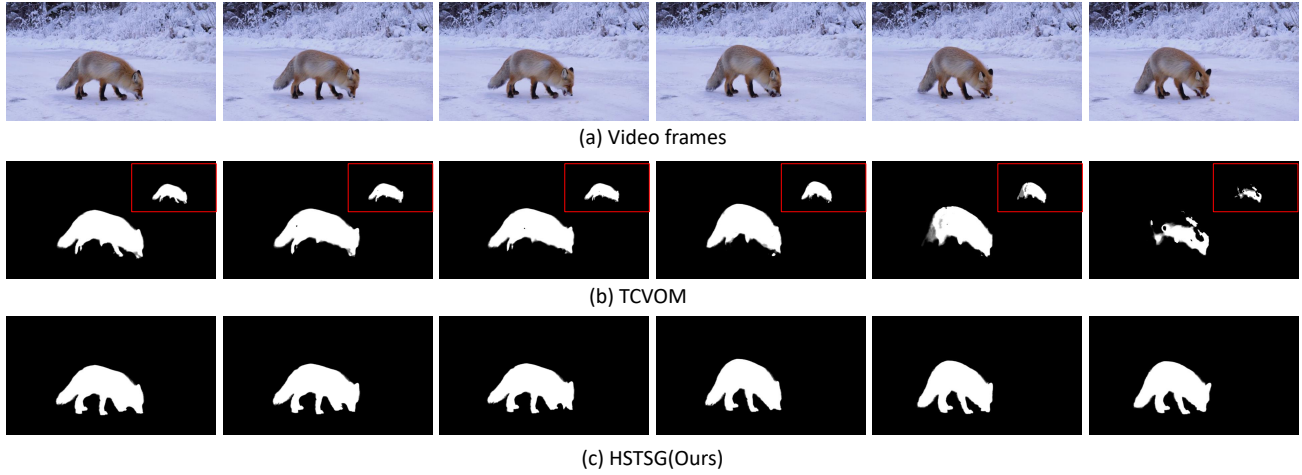

Figure 3. Visual comparisons on the real-world high-resolution video 3.

*ference on Computer Vision and Pattern Recognition*, pages 6975–6984, 2021.

- [2] Ning Xu, Brian Price, Scott Cohen, and Thomas Huang. Deep image matting. In *Proceedings of the IEEE conference on computer vision and pattern recognition*, pages 2970–2979, 2017.
- [3] Yunke Zhang, Chi Wang, Miaomiao Cui, Peiran Ren, Xuan-song Xie, Xian-Sheng Hua, Hujun Bao, Qixing Huang, and Weiwei Xu. Attention-guided temporally coherent video object matting. In *Proceedings of the 29th ACM International Conference on Multimedia*, pages 5128–5137, 2021.
