# Supplementary material
Source: ML conference proceedings conference paper supplement (https://openaccess.thecvf.com/content/WACV2023/html/Wang_Video_Object_Matting_WACV_2023_paper.html)
Supplement: Supplementary file 2 [file Wang_Video_Object_Matting_WACV_2023_supplemental.zip]

Archive with 2 entries (2 files):
- 1296-supp.pdf
- 1296.mp4
